# Supplementary material for: Metabolic fingerprint of insulin resistance in human polymorphonuclear leucocytes
Source: PubMed Central journal article supplement (PMC6044522; doi:10.1371/journal.pone.0199351), 2018-07-13
Supplement: pone.0199351.s001.pdf [file pone.0199351.s001.pdf]

| metabolite number | left limit (ppm) | right limit (ppm) | metabolite               |
|-------------------|------------------|-------------------|--------------------------|
| 1                 | 1.47             | 1.477             | 2-aminoisobutyric acid   |
| 2                 | 1.237            | 1.247             | 3-hydroxyisovalerate     |
| 3                 | 1.888            | 1.947             | acetate                  |
| 4                 | 2.224            | 2.244             | acetoacetate             |
| 5                 | 6.15             | 6.169             | ADP                      |
| 5                 | 8.534            | 8.546             | ADP                      |
| 5+6               | 8.264            | 8.282             | ADP+ATP                  |
| 7                 | 1.477            | 1.496             | alanine                  |
| 8                 | 2.79             | 2.813             | aspartate                |
| 8                 | 2.822            | 2.841             | aspartate                |
| 8                 | 2.857            | 2.872             | aspartate                |
| 6                 | 6.12             | 6.15              | ATP                      |
| 6                 | 8.546            | 8.555             | ATP                      |
| 6                 | 8.574            | 8.588             | ATP                      |
| 5+6               | 4.495            | 4.54              | ATP+ADP                  |
| 5+6               | 4.595            | 4.634             | ATP+ADP                  |
| 9                 | 2.506            | 2.519             | b-alanine                |
| 9                 | 2.519            | 2.53              | b-alanine                |
| 10                | 2.641            | 2.656             | citrate                  |
| 10                | 2.656            | 2.667             | citrate                  |
| 11+12             | 2.976            | 3.044             | creatine/phosphocreatine |
| 11+12             | 3.922            | 3.948             | creatine/phosphocreatine |
| 13                | 8.451            | 8.467             | formate                  |
| 14+15+16          | 5.925            | 5.967             | GDP/GTP/GMP              |
| 17                | 3.454            | 3.476             | glucose                  |
| 17                | 3.473            | 3.5               | glucose                  |
| 17                | 3.516            | 3.554             | glucose                  |
| 17                | 3.691            | 3.76              | glucose                  |
| 17                | 3.76             | 3.792             | glucose                  |
| 17                | 4.634            | 4.67              | glucose                  |
| 17                | 5.223            | 5.251             | glucose                  |
| 18                | 2.323            | 2.368             | glutamate                |
| 18                | 2.048            | 2.1               | glutamate                |
| 19                | 2.433            | 2.445             | glutamine                |

|       |       |       |                                 |
|-------|-------|-------|---------------------------------|
| 19    | 2.445 | 2.47  | glutamine                       |
| 19    | 2.47  | 2.482 | glutamine                       |
| 18+19 | 2.1   | 2.136 | glutamine/glutamate             |
| 18+19 | 2.136 | 2.147 | glutamine/glutamate             |
| 20    | 3.631 | 3.669 | glycerol                        |
| 21    | 3.554 | 3.565 | glycine                         |
| 22    | 5.37  | 5.5   | glycogen                        |
| 23+24 | 3.219 | 3.23  | GPC/PC                          |
| 25    | 4.551 | 4.584 | GSH                             |
| 25+26 | 2.53  | 2.547 | GSH+GSSG                        |
| 25+26 | 2.547 | 2.559 | GSH+GSSG                        |
| 25+26 | 2.559 | 2.581 | GSH+GSSG                        |
| 25+26 | 2.918 | 2.932 | GSH+GSSG                        |
| 25+26 | 2.932 | 2.976 | GSH+GSSG                        |
| 27    | 6.09  | 6.12  | inosine                         |
| 28    | 1.005 | 1.027 | isoleucine                      |
| 29    | 1.313 | 1.346 | lactate                         |
| 29    | 4.084 | 4.143 | lactate                         |
| 30    | 0.951 | 0.982 | leucine                         |
| 31    | 3.353 | 3.368 | methanol                        |
| 32    | 2.719 | 2.74  | methionine sulfoxide            |
| 33    | 2.628 | 2.641 | methionine                      |
| 34    | 2.287 | 2.323 | methylacetoacetate              |
| 35    | 3.57  | 3.58  | myo-inositol                    |
| 36    | 2.028 | 2.048 | N-acetylaspartate               |
| 37    | 1.506 | 1.556 | N-Methyl-a-aminoisobutyric acid |
| 38    | 1.788 | 1.803 | ornitine                        |
| 38    | 1.804 | 1.826 | ornitine                        |
| 24    | 3.204 | 3.212 | PC                              |
| 39    | 7.299 | 7.443 | phenylalanine                   |
| 40    | 8.603 | 8.621 | purine                          |
| 41    | 2.368 | 2.374 | pyruvate                        |
| 42    | 3.58  | 3.631 | sarcosine                       |
| 43    | 2.381 | 2.4   | succinate                       |
| 44    | 3.252 | 3.288 | taurine                         |

|    |       |       |             |
|----|-------|-------|-------------|
| 44 | 3.411 | 3.448 | taurine     |
| 45 | 7.765 | 7.802 | tryptophane |
| 46 | 6.894 | 6.926 | tyrosine    |
| 46 | 7.184 | 7.218 | tyrosine    |
| 47 | 5.967 | 6.021 | UDP-NAG     |
| 48 | 0.982 | 1.005 | valine      |
| 48 | 1.027 | 1.058 | valine      |
