# Supplementary material for: Metabolic fingerprint of insulin resistance in human polymorphonuclear leucocytes
Source: PubMed Central journal article supplement (PMC6044522; doi:10.1371/journal.pone.0199351), 2018-07-13
Supplement: pone.0199351.s002.pdf [file pone.0199351.s002.pdf]

| patient | weight | age | IMC   | waist | glucose | HDL | LDL | TG  | insulin | HOMA | LDL/HDL | Log(TG) | Log(TG)/HDL |
|---------|--------|-----|-------|-------|---------|-----|-----|-----|---------|------|---------|---------|-------------|
| 1       | normal | 38  | 24.61 | 88    | 133     | 40  | 175 | 133 | 14.6    | 4.79 | 4.38    | 2.12    | 0.053       |
| 2       | normal | 58  | 24.55 | 92    | 120     | 32  | 139 | 216 | 6.9     | 2.04 | 4.34    | 2.33    | 0.073       |
| 3       | normal | 47  | 23.73 | 87    | 104     | 46  | 131 | 70  | 9.6     | 2.47 | 2.85    | 1.85    | 0.04        |
| 4       | normal | 52  | 21.56 | 80    | 95      | 62  | 164 | 90  | 4.9     | 1.15 | 2.65    | 1.95    | 0.032       |
| 5       | normal | 55  | 23.69 | 85    | 96      | 54  | 158 | 100 | 9.7     | 2.3  | 2.93    | 2       | 0.037       |
| 6       | normal | 64  | 24    | 106   | 94      | 50  | 106 | 148 | 8.5     | 1.97 | 2.12    | 2.17    | 0.043       |
| 7       | normal | 62  | 24.9  | 96    | 106     | 55  | 143 | 132 | 9.6     | 2.51 | 2.6     | 2.12    | 0.039       |
| 8       | normal | 35  | 21.23 | 74    | 99      | 48  | 112 | 73  | 5.6     | 1.37 | 2.33    | 1.86    | 0.039       |
| 9       | normal | 41  | 24.95 | 88    | 100     | 38  | 110 | 158 | 6.7     | 1.65 | 2.89    | 2.2     | 0.058       |
| 10      | normal | 35  | 18.54 | 73    | 81      | 42  | 121 | 143 | 10.2    | 2.04 | 2.88    | 2.16    | 0.051       |
| 11      | normal | 21  | 24.72 | 86    | 72      | NA  | 47  | 68  | NA      | NA   | NA      | 1.83    | NA          |
| 12      | normal | 25  | 22.95 | NA    | 83      | 33  | 60  | 91  | 10.4    | 2.13 | 1.82    | 1.96    | 0.059       |
| 13      | normal | 34  | 20.17 | 86    | 89      | 61  | 91  | 46  | 6.5     | 1.43 | 1.49    | 1.66    | 0.027       |
| 14      | normal | 42  | 23.51 | 88    | 84      | 39  | 112 | 80  | NA      | NA   | 2.87    | 1.9     | 0.049       |
| 15      | normal | 26  | 16.65 | 72    | 88      | 34  | 48  | 105 | 4.2     | 0.91 | 1.41    | 2.02    | 0.059       |
| 16      | normal | 23  | 19.33 | 82    | 87      | 41  | 101 | 84  | 6.5     | 1.4  | 2.46    | 1.92    | 0.047       |
| 17      | normal | 38  | 21.25 | NA    | 80      | 49  | 104 | 61  | NA      | NA   | 2.12    | 1.79    | 0.036       |
| 18      | obese  | 31  | 37.98 | 117   | 80      | NA  | NA  | NA  | 9.6     | 1.9  | NA      | NA      | NA          |
| 19      | obese  | 34  | 37.96 | 119   | 94      | 34  | 114 | 97  | 14.2    | 3.3  | 3.35    | 1.99    | 0.058       |
| 20      | obese  | 37  | 39.8  | 110   | 77      | 32  | 122 | 123 | 12.1    | 2.3  | 3.81    | 2.09    | 0.065       |
| 21      | obese  | 38  | 57.31 | 150   | 95      | 27  | 123 | 130 | 37.5    | 8.8  | 4.56    | 2.11    | 0.078       |
| 22      | obese  | 35  | 42.55 | 143   | 74      | 41  | 143 | 157 | 21.5    | 3.93 | 3.49    | 2.2     | 0.054       |
| 23      | obese  | 35  | 56.2  | 150   | 98      | 31  | 110 | 284 | 24.3    | 5.88 | 3.55    | 2.45    | 0.079       |
| 24      | obese  | 55  | 43.05 | 114   | 75      | 41  | 133 | 170 | 30.5    | 5.65 | 3.24    | 2.23    | 0.054       |
| 25      | obese  | 29  | 44.14 | 113   | 95      | 42  | 102 | 69  | 14.9    | 3.5  | 2.43    | 1.84    | 0.044       |
| 26      | obese  | 23  | 39.58 | NA    | 94      | 41  | 136 | 233 | 14      | 3.25 | 3.32    | 2.37    | 0.058       |
| 27      | obese  | 40  | 40.22 | 134   | 112     | 29  | 47  | 146 | 26.4    | 7.3  | 1.62    | 2.16    | 0.075       |
| 28      | obese  | 45  | 51.99 | 138   | 106     | 46  | 94  | 159 | 10.3    | 2.7  | 2.04    | 2.2     | 0.048       |
| 29      | obese  | 49  | 45.73 | 137   | 111     | 38  | 62  | 86  | 11.8    | 3.23 | 1.63    | 1.93    | 0.051       |
| 30      | obese  | 46  | 54.82 | 122   | 103     | 40  | 189 | 185 | 23.4    | 5.95 | 4.73    | 2.27    | 0.057       |
| 31      | obese  | 44  | 47.1  | 150   | 100     | 39  | 119 | 120 | 19      | 4.69 | 3.05    | 2.08    | 0.053       |
| 32      | obese  | 55  | 45.88 | 145   | 118     | 37  | 65  | 90  | 22.3    | 6.5  | 1.76    | 1.95    | 0.053       |
| 33      | obese  | 54  | 40.64 | 120   | 102     | 32  | 105 | 90  | 9.3     | 2.34 | 3.28    | 1.95    | 0.061       |
| 34      | obese  | 42  | 48.5  | 109   | 100     | 43  | 121 | 76  | 18.1    | 4.47 | 2.81    | 1.88    | 0.044       |
