# Supplementary material for: Metabolic fingerprint of insulin resistance in human polymorphonuclear leucocytes
Source: PubMed Central journal article supplement (PMC6044522; doi:10.1371/journal.pone.0199351), 2018-07-13
Supplement: pone.0199351.s003.pdf [file pone.0199351.s003.pdf]

| left limit (ppm) | right limit (ppm) | Patient number           | metabolite |        |        |        |        |        |        |        |        |        |        |        |        |        |        |        |        | mean   | SEM   |
|------------------|-------------------|--------------------------|------------|--------|--------|--------|--------|--------|--------|--------|--------|--------|--------|--------|--------|--------|--------|--------|--------|--------|-------|
|                  |                   |                          | 1          | 2      | 3      | 4      | 5      | 6      | 7      | 8      | 9      | 10     | 11     | 12     | 13     | 14     | 15     | 16     | 17     |        |       |
| 1.47             | 1.477             | 2-aminoisobutyric acid   | 3.201      | 2.910  | 3.084  | 2.902  | 2.871  | 2.733  | 2.795  | 2.679  | 3.694  | 2.444  | 2.274  | 2.533  | 2.424  | 2.421  | 2.395  | 2.702  | 1.819  | 2.699  | 0.102 |
| 1.237            | 1.247             | hydroxyisovalerate       | 33.969     | 15.152 | 28.041 | 24.347 | 17.282 | 26.709 | 16.603 | 14.688 | 24.414 | 10.422 | 8.438  | 8.953  | 13.889 | 15.343 | 17.526 | 12.205 | 7.641  | 17.390 | 1.843 |
| 1.888            | 1.947             | acetate                  | 22.332     | 21.307 | 22.798 | 23.796 | 19.554 | 20.406 | 19.744 | 20.677 | 25.424 | 18.621 | 17.624 | 18.407 | 19.601 | 18.786 | 19.511 | 19.511 | 14.551 | 20.058 | 0.629 |
| 2.224            | 2.244             | acetoacetate             | 8.235      | 5.272  | 6.976  | 6.572  | 7.034  | 4.826  | 4.834  | 6.614  | 4.080  | 4.141  | 4.140  | 4.837  | 5.321  | 4.837  | 5.321  | 4.599  | 3.376  | 5.336  | 0.316 |
| 6.15             | 6.169             | ADP                      | 1.321      | 1.653  | 1.382  | 1.248  | 1.695  | 1.523  | 0.921  | 1.519  | 1.542  | 1.672  | 0.773  | 1.877  | 1.525  | 1.491  | 2.223  | 1.648  | 1.975  | 1.539  | 0.085 |
| 8.534            | 8.546             | ADP                      | 1.475      | 0.933  | 1.178  | 1.019  | 0.832  | 1.301  | 0.577  | 0.714  | 1.064  | 0.653  | 0.449  | 0.912  | 0.771  | 0.874  | 1.101  | 0.772  | 1.063  | 0.921  | 0.064 |
| 8.264            | 8.282             | ADP+ATP                  | 2.204      | 1.644  | 1.851  | 1.776  | 1.557  | 2.309  | 1.126  | 1.323  | 1.760  | 1.104  | 0.969  | 1.620  | 1.588  | 1.550  | 2.467  | 1.639  | 1.771  | 1.666  | 0.099 |
| 1.477            | 1.496             | alanine                  | 10.658     | 10.665 | 10.017 | 10.170 | 10.415 | 9.462  | 10.537 | 11.286 | 11.450 | 11.706 | 8.940  | 9.538  | 9.276  | 10.460 | 8.572  | 11.768 | 8.398  | 10.195 | 0.253 |
| 2.79             | 2.813             | aspartate                | 3.162      | 2.448  | 2.651  | 2.646  | 2.450  | 2.690  | 2.060  | 2.209  | 2.840  | 2.026  | 2.215  | 2.615  | 2.644  | 2.595  | 2.435  | 2.961  | 2.340  | 2.529  | 0.074 |
| 2.822            | 2.841             | aspartate                | 2.231      | 1.812  | 2.061  | 2.052  | 1.881  | 2.216  | 1.600  | 1.608  | 2.083  | 1.553  | 1.753  | 1.845  | 1.919  | 1.798  | 1.838  | 2.211  | 1.668  | 1.884  | 0.052 |
| 2.857            | 2.872             | aspartate                | 1.852      | 1.561  | 1.823  | 1.868  | 1.605  | 1.530  | 1.603  | 1.408  | 1.888  | 1.261  | 1.420  | 1.215  | 1.484  | 1.505  | 1.327  | 1.311  | 0.937  | 1.505  | 0.063 |
| 6.12             | 6.15              | ATP                      | 1.891      | 1.672  | 1.829  | 1.537  | 1.841  | 1.956  | 1.186  | 1.701  | 2.040  | 1.602  | 1.006  | 1.705  | 1.483  | 1.702  | 2.447  | 1.757  | 1.773  | 1.713  | 0.078 |
| 8.546            | 8.555             | ATP                      | 0.943      | 0.596  | 0.889  | 0.702  | 0.586  | 1.010  | 0.476  | 0.525  | 0.845  | 0.449  | 0.304  | 0.722  | 0.595  | 0.591  | 0.756  | 0.667  | 0.884  | 0.686  | 0.048 |
| 8.574            | 8.588             | ATP                      | 1.542      | 1.074  | 1.443  | 1.312  | 1.357  | 1.226  | 0.853  | 1.349  | 1.424  | 1.741  | 0.549  | 0.790  | 0.820  | 0.892  | 0.882  | 0.974  | 0.632  | 1.109  | 0.083 |
| 4.495            | 4.54              | ATP+ADP                  | 3.263      | 5.971  | 3.803  | 5.486  | 5.189  | 4.267  | 3.947  | 5.464  | 3.967  | 6.432  | 6.160  | 7.625  | 6.192  | 5.852  | 7.075  | 6.739  | 6.161  | 5.494  | 0.307 |
| 4.595            | 4.634             | ATP+ADP                  | 6.054      | 5.961  | 3.296  | 5.732  | 4.136  | 4.839  | 4.146  | 3.940  | 3.577  | 4.439  | 4.789  | 5.758  | 5.741  | 3.718  | 5.115  | 4.804  | 5.896  | 4.822  | 0.224 |
| 2.506            | 2.519             | b-alanine                | 2.079      | 1.568  | 1.992  | 1.479  | 1.310  | 1.664  | 1.143  | 1.242  | 1.603  | 1.136  | 1.115  | 1.015  | 1.130  | 1.193  | 1.303  | 1.278  | 1.061  | 1.371  | 0.077 |
| 2.519            | 2.53              | b-alanine                | 1.995      | 1.444  | 1.785  | 1.321  | 1.287  | 1.594  | 1.209  | 1.152  | 1.546  | 1.089  | 1.031  | 1.048  | 1.029  | 1.110  | 1.270  | 1.195  | 1.138  | 1.308  | 0.068 |
| 2.641            | 2.656             | citrate                  | 2.763      | 2.556  | 2.479  | 2.533  | 2.604  | 2.556  | 2.126  | 2.626  | 2.643  | 2.462  | 2.633  | 2.190  | 2.627  | 2.733  | 3.056  | 2.841  | 2.912  | 2.609  | 0.056 |
| 2.656            | 2.667             | citrate                  | 2.116      | 1.879  | 1.787  | 1.923  | 1.988  | 1.887  | 1.406  | 1.946  | 1.869  | 1.920  | 1.953  | 1.832  | 2.022  | 2.071  | 2.149  | 2.256  | 2.256  | 1.951  | 0.049 |
| 2.976            | 3.044             | creatine/phosphocreatine | 13.275     | 23.763 | 16.953 | 24.211 | 22.994 | 16.214 | 21.798 | 21.086 | 21.287 | 22.373 | 21.312 | 23.695 | 22.964 | 21.976 | 19.793 | 20.371 | 18.089 | 20.715 | 0.729 |
| 3.922            | 3.948             | creatine/phosphocreatine | 4.553      | 6.724  | 5.196  | 6.726  | 7.199  | 6.363  | 10.360 | 8.524  | 5.620  | 8.901  | 8.993  | 9.190  | 8.421  | 9.178  | 7.483  | 9.314  | 9.605  | 7.798  | 0.419 |
| 8.451            | 8.467             | formate                  | 2.679      | 1.159  | 2.058  | 1.787  | 1.296  | 2.100  | 1.162  | 1.075  | 1.799  | 0.813  | 0.668  | 0.610  | 1.066  | 1.108  | 1.250  | 0.903  | 0.596  | 1.302  | 0.143 |
| 5.925            | 5.967             | GDP/GTP/GMP              | 6.999      | 1.961  | 1.971  | 2.054  | 1.720  | 2.342  | 1.186  | 1.657  | 2.606  | 1.506  | 1.074  | 1.151  | 1.668  | 1.376  | 2.159  | 1.366  | 1.499  | 1.741  | 0.113 |
| 3.411            | 3.448             | glucose                  | 12.671     | 31.742 | 15.822 | 12.774 | 32.628 | 24.533 | 11.263 | 25.978 | 18.458 | 23.955 | 23.842 | 35.546 | 24.521 | 36.784 | 31.506 | 28.121 | 70.015 | 20.774 | 4.006 |
| 3.454            | 3.476             | glucose                  | 2.322      | 1.763  | 2.264  | 1.900  | 1.735  | 2.247  | 2.677  | 2.028  | 1.924  | 2.193  | 1.958  | 2.344  | 1.873  | 2.055  | 1.615  | 2.141  | 2.056  | 2.005  | 0.065 |
| 3.473            | 3.5               | glucose                  | 2.008      | 0.978  | 0.781  | 0.990  | 0.816  | 1.467  | 0.657  | 0.821  | 0.759  | 0.981  | 1.267  | 0.842  | 1.070  | 0.658  | 0.745  | 1.004  | 1.112  | 0.952  | 0.082 |
| 3.516            | 3.554             | glucose                  | 6.204      | 4.390  | 5.671  | 5.043  | 5.651  | 5.763  | 7.441  | 5.170  | 5.138  | 4.771  | 5.343  | 6.049  | 5.360  | 5.302  | 4.883  | 6.148  | 5.728  | 5.530  | 0.169 |
| 3.691            | 3.76              | glucose                  | 42.340     | 28.181 | 27.890 | 29.523 | 24.648 | 29.061 | 38.717 | 31.247 | 27.645 | 31.191 | 26.978 | 31.699 | 27.783 | 33.489 | 27.388 | 27.096 | 26.823 | 30.100 | 1.099 |
| 3.76             | 3.792             | glucose                  | 10.170     | 15.770 | 11.056 | 12.665 | 17.368 | 14.440 | 18.264 | 19.015 | 12.671 | 21.291 | 19.505 | 20.180 | 17.656 | 21.543 | 20.280 | 18.799 | 24.235 | 17.353 | 0.961 |
| 4.634            | 4.67              | glucose                  | 6.447      | 4.680  | 3.121  | 4.366  | 3.065  | 3.124  | 3.750  | 3.056  | 2.628  | 3.161  | 4.007  | 3.373  | 3.855  | 1.921  | 3.406  | 3.795  | 3.472  | 3.602  | 0.237 |
| 5.223            | 5.251             | glucose                  | 2.008      | 0.978  | 0.781  | 0.990  | 0.816  | 1.467  | 0.657  | 0.821  | 0.759  | 0.981  | 1.267  | 0.842  | 1.070  | 0.658  | 0.745  | 1.004  | 1.112  | 0.952  | 0.082 |
| 2.323            | 2.368             | glutamate                | 12.875     | 12.976 | 12.059 | 11.254 | 14.067 | 12.842 | 9.793  | 11.870 | 12.273 | 12.935 | 11.515 | 15.769 | 12.850 | 14.733 | 11.654 | 17.701 | 14.297 | 13.027 | 0.453 |
| 2.048            | 2.1               | glutamate                | 17.084     | 23.615 | 19.607 | 25.668 | 23.218 | 21.458 | 20.287 | 21.814 | 22.122 | 22.989 | 22.164 | 30.989 | 25.747 | 28.676 | 24.415 | 29.997 | 24.797 | 23.628 | 0.824 |
| 2.433            | 2.445             | glutamine                | 2.434      | 1.889  | 2.304  | 1.850  | 1.628  | 2.087  | 1.649  | 1.773  | 1.953  | 1.690  | 1.677  | 1.369  | 1.468  | 1.725  | 1.575  | 1.455  | 1.368  | 1.759  | 0.074 |
| 2.445            | 2.47              | glutamine                | 5.708      | 4.834  | 5.445  | 4.425  | 4.255  | 5.216  | 3.635  | 4.408  | 4.872  | 4.755  | 4.152  | 3.264  | 3.467  | 4.076  | 4.075  | 3.506  | 3.689  | 4.360  | 0.172 |
| 2.47             | 2.482             | glutamine                | 2.304      | 1.629  | 1.935  | 1.546  | 1.439  | 1.872  | 1.253  | 1.423  | 1.770  | 1.346  | 1.285  | 1.037  | 1.187  | 1.292  | 1.316  | 1.157  | 1.073  | 1.463  | 0.083 |
| 3.631            | 3.669             | glycerol                 | 9.474      | 9.549  | 10.041 | 11.058 | 9.330  | 9.781  | 18.400 | 13.327 | 10.499 | 9.140  | 11.559 | 11.946 | 11.764 | 13.338 | 10.613 | 9.643  | 10.251 | 11.160 | 0.552 |
| 3.554            | 3.565             | glycine                  | 3.448      | 3.080  | 3.436  | 2.645  | 3.630  | 3.129  | 3.942  | 3.275  | 3.221  | 3.702  | 3.653  | 3.856  | 3.026  | 3.685  | 3.690  | 3.561  | 4.332  | 3.430  | 0.101 |
| 5.37             | 5.5               | glycogen                 | 2.958      | 3.117  | 4.745  | 2.664  | 2.247  | 4.546  | 4.904  | 3.912  | 3.466  | 2.484  | 4.076  | 2.715  | 2.463  | 3.199  | 3.352  | 2.091  | 2.127  | 3.299  | 0.222 |
| 3.219            | 3.23              | GPC/PC                   | 4.303      | 5.851  | 3.379  | 4.572  | 9.526  | 5.533  | 3.780  | 5.740  | 4.777  | 9.716  | 5.014  | 10.540 | 7.414  | 8.266  | 5.950  | 13.357 | 9.901  | 6.520  | 0.888 |
| 2.932            | 2.976             | GSH                      | 5.286      | 4.958  | 4.977  | 4.935  | 6.209  | 6.155  | 3.702  | 5.591  | 5.410  | 6.096  | 7.227  | 4.298  | 5.199  | 4.932  | 7.755  | 4.406  | 6.238  | 5.493  | 0.251 |
| 4.551            | 4.584             | GSH                      | 3.238      | 3.766  | 2.410  | 4.076  | 3.287  | 3.475  | 2.738  | 3.385  | 2.566  | 4.150  | 4.495  | 4.078  | 4.477  | 3.552  | 4.642  | 3.359  | 4.513  | 3.659  | 0.169 |
| 2.53             | 2.547             | GSH+GSSG                 | 2.933      | 2.682  | 2.906  | 2.127  | 2.619  | 2.806  | 1.650  | 2.261  | 2.726  | 2.489  | 2.121  | 1.957  | 1.900  | 2.373  | 2.764  | 2.379  | 2.815  | 2.442  | 0.094 |
| 2.547            | 2.559             | GSH+GSSG                 | 2.417      | 2.447  | 2.228  | 1.862  | 2.540  | 2.609  | 1.740  | 2.391  | 2.212  | 2.762  | 2.273  | 1.864  | 2.083  | 2.346  | 3.115  | 2.132  | 3.193  | 2.365  | 0.097 |
| 2.559            | 2.581             | GSH+GSSG                 | 4.074      | 3.632  | 3.854  | 3.452  | 4.136  | 4.176  | 2.498  | 3.795  | 3.806  | 4.379  | 4.561  | 4.208  | 4.083  | 3.773  | 4.853  | 3.237  | 5.158  | 4.066  | 0.173 |
| 2.918            | 2.932             | GSH+GSSG                 | 1.326      | 1.088  | 1.364  | 1.182  | 1.160  | 1.273  | 0.885  | 0.999  | 1.175  | 0.899  | 1.273  | 0.744  | 0.985  | 0.882  | 1.267  | 0.806  | 0.882  | 1.065  | 0.048 |
| 2.932            | 2.976             | GSH+GSSG                 | 1.760      | 1.087  | 1.439  | 1.115  | 1.138  | 1.476  | 1.015  | 1.065  | 1.453  | 0.966  | 0.624  | 0.665  | 0.967  | 1.192  | 1.653  | 1.047  | 1.257  | 1.172  | 0.075 |
| 6.09             | 6.12              | inosine                  | 0.740      | 0.513  | 0.740  | 0.565  | 0.565  | 0.741  | 0.442  | 0.485  | 0.658  | 0.532  | 0.304  | 0.322  | 0.480  | 0.588  | 0.729  | 0.555  | 0.574  | 0.603  | 0.033 |
| 1.005            | 1.027             | isoleucine               | 4.139      | 4.412  | 3.723  | 4.445  | 4.158  | 3.771  | 4.422  | 4.277  | 4.019  | 4.689  | 4.849  | 4.003  | 4.155  | 4.395  | 3.938  | 4.932  | 3.705  | 4.237  | 0.089 |
| 1.113            | 1.146             | lactate                  | 25.791     | 45.056 | 29.912 | 16.979 | 29.330 | 32.616 | 22.267 | 39.150 | 28.582 | 47.896 | 74.751 | 21.351 | 33.789 | 23.760 | 25.255 | 37.778 | 60.890 | 35.041 | 3.650 |
| 4.084            | 4.143             | lactate                  | 8.242      | 14.246 | 10.010 | 10.505 | 11.089 | 11.187 | 13.201 | 14.054 | 10.643 | 14.844 | 22.139 | 12.845 | 13.741 | 12.816 |        |        |        |        |       |
