# Supplementary material for: Metabolic fingerprint of insulin resistance in human polymorphonuclear leucocytes
Source: PubMed Central journal article supplement (PMC6044522; doi:10.1371/journal.pone.0199351), 2018-07-13
Supplement: pone.0199351.s005.pdf [file pone.0199351.s005.pdf]

|                        | Control |      | Obese |      | p         |
|------------------------|---------|------|-------|------|-----------|
|                        | mean    | SEM  | mean  | SEM  |           |
| Age                    | 40,1    | 3,6  | 43,7  | 4,8  | 0,317     |
| BMI, kg/m <sup>2</sup> | 23,9    | 2,1  | 40,8  | 4,7  | < 0.0001* |
| Waist, cm              | 78,9    | 3,8  | 118,5 | 16,0 | 0,0002*   |
| Glucose, mg/dL         | 87,3    | 3,7  | 94,1  | 17,8 | 0,1674    |
| HDL, mg/dL             | 79,4    | 2,2  | 39,3  | 16,5 | 0,0003*   |
| LDL, mg/dL             | 78,1    | 8,8  | 110,9 | 14,8 | 0,0107*   |
| TG, mg/dL              | 115,3   | 34,7 | 140,6 | 17,2 | 0,7042    |
| Insulin, mg/dL         | 9,0     | 3,3  | 17,8  | 1,2  | 0,0331*   |
| HOMA-IR                | 2,0     | 0,7  | 4,1   | 0,3  | 0,0131*   |
