# Supplementary material for: Metabolic fingerprint of insulin resistance in human polymorphonuclear leucocytes
Source: PubMed Central journal article supplement (PMC6044522; doi:10.1371/journal.pone.0199351), 2018-07-13
Supplement: pone.0199351.s006.pdf [file pone.0199351.s006.pdf]

|                        | Control<br>(n=10) |      | Obese<br>(n=10) |      | p       |
|------------------------|-------------------|------|-----------------|------|---------|
|                        | mean              | SEM  | mean            | SEM  |         |
| 3-hydroxyisovalerate   | 9,27              | 1,05 | 5,99            | 0,67 | 0,0183* |
| 2-aminoisobutyric acid | 5,09              | 0,60 | 6,16            | 0,45 | 0,0535  |
| acetate                | 2,18              | 0,29 | 2,92            | 0,30 | 0,1489  |
| β-alanine              | 0,45              | 0,11 | 0,10            | 0,10 | 0,0448* |
| glycine                | 11,45             | 4,67 | 11,23           | 0,74 | 0,0049* |
| inosine                | 0,22              | 0,11 | 0,05            | 0,09 | 0,2751  |
