# Supplementary material for: Metabolic fingerprint of insulin resistance in human polymorphonuclear leucocytes
Source: PLoS One. 2018 Jul 13;13(7):e0199351. doi: 10.1371/journal.pone.0199351 (PMC6044522; doi:10.1371/journal.pone.0199351)
Supplement: S4 Table — (PDF) [file pone.0199351.s004.pdf]

| left limit<br>(ppm) | right limit<br>(ppm) | Patient number<br>metabolite | 18     | 19     | 20     | 21     | 22     | 23     | 24     | 25     | 26     | 27      | 28     | 29     | 30     | 31     | 32     | 33     | 34     | mean obese | SEM obese |
|---------------------|----------------------|------------------------------|--------|--------|--------|--------|--------|--------|--------|--------|--------|---------|--------|--------|--------|--------|--------|--------|--------|------------|-----------|
|                     |                      |                              | obese   | obese  | obese  | obese  | obese  | obese  | obese  | obese  |            |           |
| 1.47                | 1.477                | 2-aminoisobutyric acid       | 4.313  | 4.043  | 4.983  | 5.066  | 4.189  | 3.664  | 4.710  | 4.835  | 4.573  | 1.930   | 4.301  | 3.005  | 3.286  | 5.484  | 3.608  | 5.103  | 4.808  | 4.729      | 0.202     |
| 1.237               | 1.247                | hydroxyisovalerate           | 9.605  | 7.546  | 8.821  | 9.360  | 7.263  | 6.192  | 8.971  | 7.347  | 8.417  | 2.995   | 7.905  | 4.941  | 5.712  | 12.385 | 6.802  | 10.831 | 9.043  | 7.949      | 0.508     |
| 1.888               | 1.947                | acetate                      | 27.208 | 28.379 | 30.851 | 28.060 | 28.503 | 23.520 | 28.239 | 27.838 | 28.825 | 21.079  | 26.824 | 19.938 | 21.193 | 32.066 | 21.395 | 27.161 | 30.066 | 26.538     | 0.828     |
| 2.224               | 2.244                | acetoacetate                 | 4.949  | 4.570  | 5.683  | 5.588  | 4.838  | 4.227  | 4.794  | 5.011  | 4.768  | 2.259   | 4.817  | 3.694  | 3.931  | 6.453  | 4.034  | 5.197  | 5.273  | 4.711      | 0.208     |
| 6.15                | 6.169                | ADP                          | 1.154  | 1.491  | 1.335  | 1.778  | 1.221  | 1.860  | 1.211  | 0.987  | 0.968  | 1.268   | 1.338  | 1.549  | 2.039  | 2.124  | 2.432  | 1.311  | 1.231  | 1.488      | 0.094     |
| 8.534               | 8.546                | ADP                          | 1.084  | 0.961  | 1.030  | 1.120  | 0.730  | 0.780  | 0.806  | 0.725  | 0.813  | 0.691   | 0.748  | 0.750  | 1.033  | 1.524  | 1.040  | 1.057  | 0.880  | 0.933      | 0.047     |
| 8.264               | 8.282                | ADP+ATP                      | 1.671  | 1.596  | 1.725  | 1.837  | 1.361  | 1.680  | 1.587  | 1.324  | 1.445  | 1.154   | 1.683  | 1.304  | 1.797  | 2.442  | 1.811  | 1.898  | 1.476  | 1.635      | 0.065     |
| 1.477               | 1.496                | alanine                      | 7.502  | 9.675  | 9.869  | 11.501 | 10.631 | 9.240  | 11.102 | 14.089 | 12.076 | 5.467   | 10.512 | 8.379  | 9.544  | 8.553  | 8.934  | 9.402  | 11.296 | 9.869      | 0.435     |
| 2.79                | 2.813                | aspartate                    | 2.247  | 2.985  | 2.763  | 2.562  | 2.842  | 2.163  | 2.717  | 2.618  | 2.472  | 1.309   | 2.727  | 2.040  | 2.001  | 3.175  | 2.650  | 3.020  | 2.682  | 2.528      | 0.103     |
| 2.822               | 2.841                | aspartate                    | 1.899  | 2.189  | 2.108  | 2.033  | 2.087  | 1.737  | 1.981  | 2.014  | 1.923  | 0.930   | 2.207  | 1.562  | 1.450  | 2.376  | 1.917  | 2.232  | 2.073  | 1.925      | 0.078     |
| 2.857               | 2.872                | aspartate                    | 1.546  | 1.766  | 1.871  | 1.444  | 1.743  | 1.348  | 1.722  | 1.796  | 1.903  | 0.745   | 1.826  | 1.182  | 1.227  | 1.796  | 1.210  | 1.782  | 1.584  | 1.558      | 0.072     |
| 6.12                | 6.15                 | ATP                          | 1.720  | 1.699  | 1.534  | 2.093  | 1.482  | 2.073  | 1.577  | 1.430  | 1.192  | 1.266   | 1.854  | 1.507  | 1.831  | 2.429  | 2.248  | 1.686  | 1.452  | 1.710      | 0.077     |
| 8.546               | 8.555                | ATP                          | 0.658  | 0.691  | 0.631  | 0.780  | 0.558  | 0.593  | 0.713  | 0.538  | 0.653  | 0.446   | 0.543  | 0.495  | 0.683  | 1.031  | 0.623  | 0.840  | 0.665  | 0.655      | 0.031     |
| 8.574               | 8.588                | ATP                          | 1.121  | 0.950  | 1.334  | 1.411  | 1.049  | 0.969  | 0.998  | 0.903  | 0.982  | 0.545   | 0.950  | 1.068  | 1.457  | 1.485  | 1.923  | 1.135  | 0.916  | 1.129      | 0.070     |
| 4.495               | 4.54                 | ATP+ADP                      | 3.165  | 6.122  | 7.983  | 5.103  | 5.524  | 5.509  | 3.920  | 4.927  | 4.284  | 4.514   | 4.915  | 6.545  | 7.969  | 4.259  | 6.948  | 5.006  | 3.544  | 5.308      | 0.316     |
| 4.595               | 4.634                | ATP+ADP                      | 1.884  | 5.224  | 6.469  | 3.697  | 5.130  | 3.737  | 4.353  | 4.503  | 3.523  | 3.961   | 3.486  | 3.893  | 7.193  | 4.760  | 5.237  | 3.657  | 5.319  | 4.472      | 0.278     |
| 2.506               | 2.519                | b-alanine                    | 2.081  | 1.627  | 1.973  | 2.237  | 1.640  | 1.397  | 1.849  | 1.755  | 1.690  | 0.853   | 1.852  | 1.322  | 1.214  | 2.620  | 1.487  | 1.865  | 1.723  | 1.717      | 0.091     |
| 2.519               | 2.53                 | b-alanine                    | 1.737  | 1.484  | 1.848  | 1.881  | 1.566  | 1.323  | 1.635  | 1.550  | 1.513  | 0.888   | 1.604  | 1.241  | 1.141  | 2.330  | 1.388  | 1.609  | 1.624  | 1.551      | 0.072     |
| 2.641               | 2.656                | citrate                      | 2.123  | 2.507  | 2.679  | 2.420  | 2.530  | 2.593  | 2.436  | 2.506  | 2.504  | 1.612   | 2.448  | 2.524  | 2.579  | 2.916  | 2.535  | 2.433  | 2.682  | 2.472      | 0.061     |
| 2.656               | 2.667                | citrate                      | 1.538  | 2.007  | 1.836  | 1.947  | 1.952  | 1.887  | 1.950  | 1.859  | 1.877  | 1.717   | 1.900  | 1.777  | 1.920  | 2.139  | 2.015  | 1.919  | 2.011  | 1.862      | 0.047     |
| 2.976               | 3.044                | creatine/phosphocreatine     | 12.161 | 24.799 | 23.665 | 16.685 | 27.128 | 22.735 | 23.218 | 26.776 | 26.812 | 13.774  | 24.870 | 18.102 | 22.635 | 14.633 | 18.873 | 20.828 | 23.757 | 21.262     | 1.062     |
| 3.922               | 3.948                | creatine/phosphocreatine     | 4.995  | 8.438  | 7.295  | 6.609  | 8.108  | 10.364 | 7.738  | 8.585  | 8.394  | 8.237   | 8.096  | 10.849 | 8.754  | 5.142  | 8.096  | 8.253  | 8.383  | 8.051      | 0.334     |
| 8.451               | 8.467                | formate                      | 1.848  | 1.322  | 1.761  | 1.746  | 1.397  | 1.173  | 1.776  | 1.312  | 1.595  | 0.625   | 1.421  | 0.945  | 1.056  | 2.572  | 1.282  | 2.097  | 1.677  | 1.506      | 0.103     |
| 5.925               | 5.967                | GDP/GTP/GMP                  | 2.117  | 1.858  | 2.687  | 2.182  | 1.901  | 1.668  | 1.978  | 1.551  | 1.823  | 1.195   | 1.631  | 1.360  | 1.872  | 2.952  | 1.953  | 1.855  | 1.742  | 1.901      | 0.096     |
| 3.411               | 3.448                | glucose                      | 32.022 | 19.729 | 13.529 | 30.493 | 16.609 | 37.370 | 16.543 | 24.569 | 19.581 | 30.368  | 22.729 | 25.625 | 51.249 | 36.029 | 65.954 | 16.565 | 22.559 | 28.325     | 3.049     |
| 3.454               | 3.476                | glucose                      | 18.155 | 1.829  | 2.380  | 2.220  | 1.487  | 2.372  | 2.095  | 1.941  | 1.837  | 1.542   | 1.880  | 4.353  | 2.288  | 2.396  | 2.166  | 2.570  | 2.319  | 3.146      | 0.875     |
| 3.473               | 3.5                  | glucose                      | 26.953 | 2.558  | 2.794  | 2.579  | 2.253  | 3.009  | 2.783  | 2.555  | 2.565  | 2.002   | 2.529  | 6.553  | 2.632  | 2.944  | 5.627  | 3.328  | 2.975  | 4.337      | 1.322     |
| 3.516               | 3.554                | glucose                      | 16.671 | 5.015  | 4.836  | 4.636  | 4.436  | 4.910  | 4.832  | 4.820  | 4.741  | 3.347   | 5.078  | 8.387  | 4.154  | 5.117  | 4.844  | 5.687  | 4.797  | 5.665      | 0.673     |
| 3.691               | 3.76                 | glucose                      | 54.103 | 25.579 | 25.913 | 19.082 | 21.313 | 24.586 | 22.938 | 23.312 | 28.286 | 267.166 | 21.975 | 43.124 | 25.039 | 19.507 | 19.698 | 26.396 | 24.528 | 40.700     | 13.197    |
| 3.76                | 3.792                | glucose                      | 20.235 | 15.509 | 13.749 | 13.141 | 13.783 | 19.411 | 13.578 | 15.121 | 16.585 | 18.832  | 15.375 | 24.684 | 20.814 | 11.539 | 19.426 | 14.364 | 15.713 | 16.580     | 0.772     |
| 4.634               | 4.67                 | glucose                      | 18.371 | 3.467  | 2.970  | 2.454  | 4.143  | 2.785  | 3.854  | 3.702  | 2.225  | 2.412   | 3.065  | 3.762  | 4.098  | 4.704  | 4.298  | 2.928  | 5.422  | 4.392      | 0.828     |
| 5.223               | 5.251                | glucose                      | 10.920 | 0.881  | 1.080  | 0.825  | 1.305  | 1.149  | 1.311  | 0.911  | 0.960  | 0.772   | 0.909  | 1.773  | 1.002  | 1.430  | 1.000  | 1.069  | 1.386  | 1.648      | 0.536     |
| 2.323               | 2.368                | glutamate                    | 10.168 | 14.684 | 11.990 | 13.518 | 12.932 | 11.154 | 12.889 | 13.324 | 11.888 | 8.569   | 14.521 | 12.862 | 12.136 | 12.015 | 12.771 | 11.722 | 12.744 | 12.346     | 0.331     |
| 2.048               | 2.1                  | glutamate                    | 18.365 | 29.384 | 25.886 | 20.416 | 26.314 | 26.631 | 23.612 | 25.747 | 28.346 | 17.475  | 25.704 | 24.667 | 26.632 | 20.990 | 21.612 | 22.643 | 26.763 | 24.141     | 0.779     |
| 2.433               | 2.445                | glutamine                    | 1.916  | 1.770  | 1.818  | 2.062  | 1.843  | 1.577  | 1.855  | 1.976  | 1.855  | 0.933   | 1.906  | 1.333  | 1.508  | 2.634  | 1.748  | 1.780  | 1.920  | 1.790      | 0.078     |
| 2.445               | 2.47                 | glutamine                    | 4.737  | 4.216  | 4.770  | 5.377  | 4.169  | 4.218  | 4.369  | 4.788  | 4.585  | 2.610   | 4.557  | 3.529  | 4.204  | 6.702  | 5.039  | 4.683  | 5.080  | 4.564      | 0.188     |
| 2.47                | 2.482                | glutamine                    | 1.728  | 1.433  | 1.581  | 1.939  | 1.375  | 1.283  | 1.442  | 1.613  | 1.514  | 0.763   | 1.582  | 1.129  | 1.167  | 2.320  | 1.529  | 1.571  | 1.610  | 1.505      | 0.075     |
| 3.631               | 3.669                | glycerol                     | 8.366  | 11.867 | 12.227 | 9.259  | 9.504  | 10.882 | 10.542 | 10.598 | 13.269 | 8.323   | 10.463 | 14.409 | 11.793 | 9.823  | 9.138  | 12.678 | 11.688 | 10.872     | 0.386     |
| 3.554               | 3.565                | glycine                      | 2.466  | 2.555  | 3.024  | 3.363  | 2.626  | 2.962  | 3.039  | 2.788  | 2.809  | 2.415   | 2.869  | 4.798  | 3.078  | 2.838  | 3.250  | 3.052  | 2.802  | 2.984      | 0.119     |
| 5.37                | 5.5                  | glycogen                     | 4.893  | 3.653  | 4.272  | 5.126  | 2.605  | 2.936  | 3.283  | 3.010  | 3.494  | 2.782   | 3.872  | 4.777  | 2.289  | 4.799  | 2.634  | 3.967  | 2.095  | 3.558      | 0.216     |
| 3.219               | 3.23                 | GPC/PC                       | 3.389  | 8.149  | 4.720  | 6.100  | 8.392  | 6.644  | 6.961  | 6.366  | 5.743  | 4.858   | 7.762  | 8.121  | 7.410  | 4.293  | 8.876  | 5.589  | 5.229  | 6.388      | 0.356     |
| 2.932               | 2.976                | GSH                          | 3.968  | 4.462  | 5.549  | 5.651  | 4.934  | 5.911  | 4.943  | 4.842  | 4.638  | 3.621   | 5.882  | 5.283  | 7.398  | 6.563  | 7.047  | 5.353  | 5.164  | 5.376      | 0.225     |
| 4.551               | 4.584                | GSH                          | 1.807  | 3.660  | 5.629  | 3.008  | 3.642  | 3.350  | 2.811  | 3.080  | 3.016  | 3.158   | 3.103  | 3.717  | 5.996  | 3.060  | 4.358  | 3.284  | 2.868  | 3.503      | 0.227     |
| 2.53                | 2.547                | GSH+GSSG                     | 2.637  | 2.336  | 2.631  | 3.035  | 2.339  | 2.563  | 2.473  | 2.576  | 2.304  | 1.869   | 2.645  | 2.196  | 2.222  | 3.524  | 2.769  | 2.395  | 2.505  | 2.531      | 0.082     |
| 2.547               | 2.559                | GSH+GSSG                     | 1.939  | 2.114  | 2.084  | 2.662  | 2.084  | 2.569  | 2.059  | 2.128  | 2.175  | 1.967   | 2.386  | 2.576  | 2.736  | 3.158  | 3.161  | 2.176  | 2.229  | 2.365      | 0.086     |
| 2.559               | 2.581                | GSH+GSSG                     | 3.321  | 3.665  | 3.545  | 4.275  | 3.647  | 4.151  | 3.318  | 3.402  | 3.297  | 5.664   | 4.003  | 7.940  | 4.401  | 4.908  | 4.565  | 3.606  | 3.712  | 4.189      | 0.261     |
| 2.918               | 2.932                | GSH+GSSG                     | 1.091  | 1.123  | 1.462  | 1.075  | 1.132  | 1.034  | 1.156  | 1.094  | 1.139  | 0.555   | 1.153  | 0.980  | 1.122  | 1.622  | 1.103  | 1.326  | 1.095  | 1.113      | 0.049     |
| 2.932               | 2.976                | GSH+GSSG                     | 1.464  | 1.148  | 1.237  | 1.390  | 1.198  | 1.695  | 1.523  | 1.512  | 1.715  | 1.111   | 1.342  | 0.935  | 0.946  | 2.038  | 1.098  | 1.678  | 1.976  | 1.412      | 0.074     |
| 6.09                | 6.12                 | inosine                      | 0.691  | 0.446  | 0.759  | 0.622  | 0.533  | 0.738  | 0.686  | 0.637  | 0.704  | 0.515   | 0.531  | 0.483  | 0.518  | 0.768  | 0.591  | 0.825  | 0.733  | 0.635      | 0.026     |
| 1.005               | 1.027                | isoleucine                   | 3.140  | 4.645  | 4.728  | 3.956  | 5.218  | 4.350  | 5.260  | 5.734  | 5.596  | 2.798   | 4.717  | 3.533  | 4.297  | 3.870  | 3.666  | 5.168  | 4.816  | 4.441      | 0.190     |
| 1.113               | 1.146                | lactate                      | 16.436 | 17.260 | 20.450 | 36.390 | 26.179 | 51.004 | 33.802 | 14.977 | 15.956 | 72.387  | 34.181 | 34.966 | 25.596 | 16.251 | 44.547 | 29.078 | 18.180 | 29.861     | 3.672     |
| 4.084               | 4.143                | lactate                      | 7.532  | 11.290 | 12.856 | 11.713 | 12.186 | 16.352 | 12.604 | 10.593 | 11.580 | 18.588  | 12.752 | 16.999 | 12.528 | 6.954  | 13.861 | 12.116 | 9.583  | 12.358     | 0.673     |
| 0.951               | 0.982                | leucine                      | 10.995 | 22.953 | 20.866 | 18.473 | 27.270 | 22.176 | 25.554 | 28.079 | 25.992 | 13.516  | 23.311 | 19.246 | 22.871 | 12.356 | 19.306 | 23.304 | 23.201 | 21.145     | 1.121     |
| 3.353               |                      |                              |        |        |        |        |        |        |        |        |        |         |        |        |        |        |        |        |        |            |           |
